# Supplementary material for: Unveiling new [1+1] Schiff-base macrocycles towards high energy-barrier hexagonal bipyramidal Dy(iii) single-molecule magnets
Source: Royal Society of Chemistry journal article supplement (doi:10.1039/d4cc04551c), 2024-01-01
Supplement: d4cc04551c1.pdf [file d4cc04551c1.pdf]

## ELECTRONIC SUPPLEMENTARY INFORMATION

### **Unveiling new [1+1] Schiff-base macrocycles towards high energy-barrier hexagonal bipyramidal Dy(III) single-molecule magnets**

Alexandros S. Armenis,<sup>a</sup> Arpan Mondal,<sup>b</sup> Sean R. Giblin,<sup>c</sup> Catherine P. Raptopoulou,<sup>d</sup> Vassilis Psycharis,<sup>d</sup> Dimitris I. Alexandropoulos,<sup>a</sup> Jinkui Tang,<sup>e</sup> Richard A. Layfield\*<sup>b</sup> and Theocharis C. Stamatatos\*<sup>a</sup>

<sup>a</sup> *Department of Chemistry, University of Patras, Patras 26504, Greece. E-mail: thstama@upatras.gr; tel.: +30-2610996730.*

<sup>b</sup> *Department of Chemistry, School of Life Sciences, University of Sussex, Brighton BN1 9QR, U.K. E-mail: R.Layfield@sussex.ac.uk*

<sup>c</sup> *School of Physics and Astronomy, Cardiff University, Cardiff CF24 3AA, U.K.*

<sup>d</sup> *Institute of Nanoscience and Nanotechnology, NCSR “Demokritos”, Aghia Paraskevi Attikis 15310, Greece.*

<sup>e</sup> *State Key Laboratory of Rare Earth Resource Utilization, Changchun Institute of Applied Chemistry, Chinese Academy of Sciences, Changchun 130022, P. R. China.*

## **Table of Contents**

- 1. Materials and Physical Measurements**
- 2. Synthesis and Structural Characterization**
- 3. Magnetic Measurements**
- 4. *Ab initio* calculations**
- 5. Additional Data and Plots**
- 6. References**

### **1. Materials and Physical Measurements**

All experiments were carried out under aerobic conditions using materials and solvents as received without further purification. Elemental analyses (C, H, N) were performed by the University of Patras microanalytical service. DC and AC magnetic susceptibility measurements were performed using a Quantum Design MPMS-XL7 and a Quantum Design MPMS3 SQUID (up to frequencies of 1 kHz) magnetometers, respectively. AC susceptibility measurements up to 1 MHz were performed using a bespoke coil set integrated into the bore of a Quantum Design PPMS. Samples were prepared by gently crushing the crystalline materials before transferring them to a 7 mm NMR tube and covering them in eicosane. Then the tubes were flame-sealed under a static vacuum. The eicosane was melted in a water bath at 40 °C to prevent crystallite torquing. Diamagnetic corrections were performed using Pascal's constants.<sup>1</sup>

### **2. Synthesis and Structural Characterization**

[Dy(L<sup>N6</sup>)(Ph<sub>3</sub>SiO)<sub>2</sub>](PF<sub>6</sub>) (1-L<sup>N6</sup>): 2,6-Diacetylpyridine (0.20 mmol, 0.032 g), tetraethylenepentamine (0.20 mmol, 0.038 mL), and DyCl<sub>3</sub>·6H<sub>2</sub>O (0.20 mmol, 0.075 g) were transferred to a round bottom flask containing 15 mL of methanol resulting in a clear yellow solution. The mixture was refluxed for 24 hours giving an orange-colored clear solution and then the solvent was removed under reduced pressure yielding an oily precipitate. Then, to the residue was added a CH<sub>2</sub>Cl<sub>2</sub> solution (15 mL) containing Ph<sub>3</sub>SiOH

(0.80 mmol, 0.222 g) and Et<sub>3</sub>N (0.80 mmol, 0.112 mL), and subsequently a H<sub>2</sub>O solution (15 mL) containing NH<sub>4</sub>PF<sub>6</sub> (0.20 mmol, 0.032 g), creating two layers. The reaction mixture was refluxed for 1 hour and the yellow, almost clear CH<sub>2</sub>Cl<sub>2</sub> phase was separated with a separating funnel and then filtered giving a clear yellow solution. Pale yellow plate-like crystals suitable for single-crystal X-ray diffraction were isolated after 2-3 days by layering the CH<sub>2</sub>Cl<sub>2</sub> solution with hexane. The crystals were collected by filtration, washed with CH<sub>2</sub>Cl<sub>2</sub> (2 × 2 mL), and dried in air. The yield was 41% (based on Dy). The air-dried solid was analyzed as **1-L<sup>N6</sup>**. Anal. Calcd for C<sub>53</sub>H<sub>58</sub>DyF<sub>6</sub>N<sub>6</sub>O<sub>2</sub>PSi<sub>2</sub>: C, 54.19; H, 4.98; N, 7.15. Found: C, 54.22; H, 4.84; N, 7.08.

**[Dy(L<sup>N303</sup>)(Ph<sub>3</sub>SiO)<sub>2</sub>](PF<sub>6</sub>) (1-L<sup>N303</sup>)**: 2,6-Diacetylpyridine (0.20 mmol, 0.032 g), 1,11-diamino-3,6,9-trioxaundecane (0.20 mmol, 0.030 mL), and Dy(NO<sub>3</sub>)<sub>3</sub>·5H<sub>2</sub>O (0.20 mmol, 0.088 g), were transferred to a round bottom flask containing 15 mL of methanol resulting in a yellow cloudy solution. The mixture was refluxed for 24 hours giving an orange/yellow colored cloudy solution and then the solvent was removed under reduced pressure yielding an orange/yellow solid. Then, to the residue was added a CH<sub>2</sub>Cl<sub>2</sub> solution (15 mL) containing Ph<sub>3</sub>SiOH (0.80 mmol, 0.222 g) and Et<sub>3</sub>N (0.80 mmol, 0.112 mL), and subsequently a H<sub>2</sub>O solution (15 mL) containing KPF<sub>6</sub> (0.20 mmol, 0.036 g), creating two layers. The reaction mixture refluxed for 1 hour and the pale yellow cloudy CH<sub>2</sub>Cl<sub>2</sub> phase was separated with a separating funnel and then filtered giving a clear pale-yellow solution. Colorless plate-like crystals suitable for single-crystal X-ray diffraction were isolated after 2-3 days by layering the CH<sub>2</sub>Cl<sub>2</sub> solution with Et<sub>2</sub>O. The crystals were collected by filtration, washed with CH<sub>2</sub>Cl<sub>2</sub> (2 × 2 mL), and dried in air. The yield was 36% (based on Dy). The air-dried solid was analyzed as **1-L<sup>N303</sup>**. Anal. Calcd for C<sub>53</sub>H<sub>55</sub>DyF<sub>6</sub>N<sub>3</sub>O<sub>5</sub>PSi<sub>2</sub>: C, 54.05; H, 4.71; N, 3.57. Found: C, 54.03; H, 4.73; N, 3.55.

### **X-Ray Crystallographic details**

Pale yellow crystals of **1-L<sup>N6</sup>** (0.09 × 0.13 × 0.32 mm) were taken directly from the mother liquor and immediately cooled to 180 K. X-ray diffraction data were collected on a Rigaku R-AXIS SPIDER Image Plate diffractometer using graphite-monochromated Mo K $\alpha$  ( $\lambda$  = 0.71073 Å) radiation. Data collection ( $\omega$ -scans) and processing (cell refinement, data

reduction and empirical absorption correction) were performed using the CrystalClear program package.<sup>2</sup> The structure of **1-L<sup>N6</sup>** was solved by direct methods using SHELXS ver. 2013/1<sup>3</sup> and refined by full-matrix least-squares techniques on  $F^2$  with SHELXL ver. 2014/6.<sup>4</sup> The structure model was refined as a racemic twin. The SQUEEZE procedure<sup>5</sup> was applied for this compound and 2.5 dichloromethane molecules per formula of the asymmetric unit of the cell was estimated, based on the accessible solvent voids volume or electron counts within the voids per cell. The hydrogen atoms were introduced at calculated positions and refined as riding on their corresponding bonded atoms. All non-H atoms were refined anisotropically. Colorless crystals of **1-L<sup>N3O3</sup>** ( $0.04 \times 0.035 \times 0.02$  mm) were taken directly from the mother liquor and immediately cooled to 173 K. X-ray diffraction data were collected on a Bruker D8 VENTURE diffractometer using graphite-monochromated Cu K $\alpha$  ( $\lambda = 1.54178$  Å) radiation. The structure was solved using direct methods with SHELXT-2014<sup>6</sup> and refined by the full-matrix least-squares method based on  $F^2$  with SHELXL-2014<sup>4</sup> through the OLEX2 interface.<sup>7</sup> The non-hydrogen atoms were successfully refined using anisotropic displacement parameters, and hydrogen atoms bonded to the carbon of the ligands were placed at their idealized positions using appropriate HFIX instructions in SHELXL. All atoms were included in subsequent refinement cycles in riding-motion approximation with isotropic thermal displacement parameters ( $U_{\text{iso}}$ ) fixed at 1.2 or 1.5 $U_{\text{eq}}$  of the relative atom. Detailed information about crystal data and structure refinement for the complexes **1-L<sup>N6</sup>** and **1-L<sup>N3O3</sup>** is summarized in **Table S1**. Further crystallographic details can be found in the corresponding CIF files. Various figures of the structures were created, using Diamond 3 and Mercury software packages.<sup>8,9</sup>

**Table S1.** Crystallographic data for compounds **1-L<sup>N6</sup>** and **1-L<sup>N303</sup>**.

| Parameter                                                              | <b>1-L<sup>N6</sup></b>                                                                                                   | <b>1-L<sup>N303</sup></b>                                                                       |
|------------------------------------------------------------------------|---------------------------------------------------------------------------------------------------------------------------|-------------------------------------------------------------------------------------------------|
| Formula                                                                | C <sub>54.25</sub> H <sub>60.5</sub> Cl <sub>2.5</sub> DyF <sub>6</sub> N <sub>6</sub> O <sub>2</sub><br>PSi <sub>2</sub> | C <sub>53</sub> H <sub>55</sub> DyF <sub>6</sub> N <sub>3</sub> O <sub>5</sub> PSi <sub>2</sub> |
| $F_w / \text{g}\cdot\text{mol}^{-1}$                                   | 1280.86                                                                                                                   | 1177.65                                                                                         |
| Crystal system                                                         | Monoclinic                                                                                                                | Monoclinic                                                                                      |
| Space group                                                            | <i>Pn</i>                                                                                                                 | <i>P2<sub>1</sub>/c</i>                                                                         |
| $a / \text{Å}$                                                         | 20.8869(6)                                                                                                                | 16.895(3)                                                                                       |
| $b / \text{Å}$                                                         | 11.3031(4)                                                                                                                | 14.733(3)                                                                                       |
| $c / \text{Å}$                                                         | 23.5314(8)                                                                                                                | 20.760(4)                                                                                       |
| $\alpha / ^\circ$                                                      | 90                                                                                                                        | 90                                                                                              |
| $\beta / ^\circ$                                                       | 98.892(1)                                                                                                                 | 97.425(7)                                                                                       |
| $\gamma / ^\circ$                                                      | 90                                                                                                                        | 90                                                                                              |
| $V / \text{Å}^3$                                                       | 5488.7(3)                                                                                                                 | 5124.3(15)                                                                                      |
| $Z$                                                                    | 2                                                                                                                         | 4                                                                                               |
| $T / K$                                                                | 180.15                                                                                                                    | 173.0                                                                                           |
| Radiation / $\lambda$ (Å)                                              | Mo K $\alpha$ / 0.71073                                                                                                   | Cu K $\alpha$ / 1.54178                                                                         |
| $\rho_{\text{calcd}} / \text{g cm}^{-3}$                               | 1.550                                                                                                                     | 1.526                                                                                           |
| Reflections collected/unique ( $R_{\text{int}}$ )                      | 102982/23012<br>(0.0593)                                                                                                  | 32297/8909<br>(0.0381)                                                                          |
| Reflections with $I > 2\sigma(I)$                                      | 20201                                                                                                                     | 7878                                                                                            |
| No. of parameters                                                      | 1280                                                                                                                      | 642                                                                                             |
| $R_1 [I > 2\sigma(I)], wR_2 [I > 2\sigma(I)]^{a,b}$                    | 0.0511, 0.1012                                                                                                            | 0.0306, 0.0836                                                                                  |
| $R_1$ (all data), $wR_2$ (all data) <sup>a,b</sup>                     | 0.0630, 0.1087                                                                                                            | 0.0359, 0.0868                                                                                  |
| $(\Delta/\sigma)_{\text{max}}$                                         | 0.016                                                                                                                     | 0.001                                                                                           |
| $\Delta\rho_{\text{max}}/\Delta\rho_{\text{min}}$ (e Å <sup>-3</sup> ) | 4.689/-4.070                                                                                                              | 0.458 /-1.320                                                                                   |
| CCDC number                                                            | 2377131                                                                                                                   | 2377167                                                                                         |

<sup>a</sup>  $R_1 = \Sigma(|F_o| - |F_c|) / \Sigma(|F_o|)$ .

<sup>b</sup>  $wR_2 = \{\Sigma[w(F_o^2 - F_c^2)^2] / \Sigma[w(F_o^2)^2]\}^{1/2}$ ,  $w = 1 / [\sigma^2(F_o^2) + (aP)^2 + bP]$ , where  $P = [\max(F_o^2, 0) + 2 F_c^2] / 3$ .

**Table S2.** Continuous Shape Measures (CShM) values for the potential coordination polyhedra of the 8-coordinate Dy<sup>III</sup> centers in complexes **1-L<sup>N6</sup>** and **1-L<sup>N3O3</sup>**.

| Polyhedron <sup>a,b</sup> | Dy1 ( <b>1-L<sup>N6</sup></b> ) | Dy2 ( <b>1-L<sup>N6</sup></b> ) | <b>1-L<sup>N3O3</sup></b> |
|---------------------------|---------------------------------|---------------------------------|---------------------------|
| OP                        | 33.60                           | 32.58                           | 31.56                     |
| HPY                       | 20.67                           | 21.77                           | 21.57                     |
| HBPY                      | 6.64                            | <b>4.53</b>                     | <b>1.61</b>               |
| CU                        | 7.77                            | 5.69                            | 9.17                      |
| SAPR                      | 7.44                            | 8.74                            | 15.44                     |
| TDD                       | <b>4.86</b>                     | 6.27                            | 13.29                     |
| JGBF                      | 7.29                            | 6.83                            | 6.53                      |
| JETBPY                    | 24.68                           | 22.00                           | 23.57                     |
| JBTPR                     | 6.01                            | 7.68                            | 14.38                     |
| BTPR                      | 5.55                            | 7.63                            | 14.16                     |
| JSD                       | 7.73                            | 8.92                            | 14.58                     |
| TT                        | 8.57                            | 6.54                            | 9.91                      |
| ETBPY                     | 22.33                           | 20.65                           | 21.04                     |

<sup>a</sup> Abbreviations: OP, Octagon; HPY, Heptagonal pyramid; HBPY, Hexagonal bipyramid; CU, Cube; SAPR, Square antiprism; TDD, Triangular dodecahedron; JGBF, Johnson gyrobifastigium; JETBPY, Johnson elongated triangular bipyramid; JBTPR, Biaugmented trigonal prism; BTPR, Biaugmented trigonal prism; JSD, Snub diphenoïd; TT, Triakis tetrahedron; ETBPY, Elongated trigonal bipyramid. <sup>b</sup> The value in boldface indicates the closest polyhedron according to the Continuous Shape Measures.

**Table S3.** Selected bond distances (Å) and angles (°) for complex **1-L<sup>N6</sup>**.

| <b>Bond distances (Å)</b> |            |             |            |
|---------------------------|------------|-------------|------------|
|                           | <b>Dy1</b> |             | <b>Dy2</b> |
| Dy1-N1                    | 2.586(9)   | Dy2-N7      | 2.566(12)  |
| Dy1-N2                    | 2.525(8)   | Dy2-N8      | 2.598(10)  |
| Dy1-N3                    | 2.514(8)   | Dy2-N9      | 2.690(11)  |
| Dy1-N4                    | 2.548(9)   | Dy2-N10     | 2.592(11)  |
| Dy1-N5                    | 2.713(9)   | Dy2-N11     | 2.686(10)  |
| Dy1-N6                    | 2.588(8)   | Dy2-N12     | 2.684(11)  |
| Dy1-O1                    | 2.194(6)   | Dy2-O3      | 2.143(7)   |
| Dy1-O2                    | 2.196(7)   | Dy2-O4      | 2.152(7)   |
| <b>Bond angles (°)</b>    |            |             |            |
|                           | <b>Dy1</b> |             | <b>Dy2</b> |
| O1-Dy1-O2                 | 158.8(2)   | O3-Dy2-O4   | 168.6(3)   |
| N1-Dy1-N2                 | 63.1(3)    | N7-Dy2-N8   | 63.7(4)    |
| N2-Dy1-N3                 | 63.8(3)    | N8-Dy2-N9   | 62.0(3)    |
| N3-Dy1-N4                 | 66.7(3)    | N9-Dy2-N10  | 62.5(3)    |
| N4-Dy1-N5                 | 65.5(3)    | N10-Dy2-N11 | 65.5(3)    |
| N5-Dy1-N6                 | 63.4(3)    | N11-Dy2-N12 | 63.1(3)    |
| N6-Dy1-N1                 | 66.5(3)    | N12-Dy2-N7  | 64.6(4)    |
| O2-Dy1-N1                 | 83.0(3)    | O3-Dy2-N7   | 89.3(4)    |
| O2-Dy1-N2                 | 82.4(3)    | O3-Dy2-N8   | 87.4(3)    |
| O2-Dy1-N3                 | 82.0(3)    | O3-Dy2-N9   | 89.3(3)    |
| O2-Dy1-N4                 | 81.6(3)    | O3-Dy2-N10  | 80.6(3)    |
| O2-Dy1-N5                 | 127.6(3)   | O3-Dy2-N11  | 114.9(3)   |
| O2-Dy1-N6                 | 82.0(3)    | O3-Dy2-N12  | 75.9(3)    |
| O1-Dy1-N1                 | 89.4(3)    | O4-Dy2-N7   | 85.9(4)    |
| O1-Dy1-N2                 | 76.5(3)    | O4-Dy2-N8   | 81.2(3)    |
| O1-Dy1-N3                 | 86.8(3)    | O4-Dy2-N9   | 85.1(3)    |
| O1-Dy1-N4                 | 110.3(3)   | O4-Dy2-N410 | 105.3(3)   |

|           |          |            |          |
|-----------|----------|------------|----------|
| O1-Dy1-N5 | 73.5(3)  | O4-Dy2-N11 | 76.5(3)  |
| O1-Dy1-N6 | 112.9(3) | O4-Dy2-N12 | 111.1(3) |

---

**Table S4.** Selected bond distances (Å) and angles (°) for complex **1-L**<sup>N3O3</sup>.

| <b>Bond distances (Å)</b> |          | <b>Bond angles (°)</b> |           |
|---------------------------|----------|------------------------|-----------|
| Dy1-N1                    | 2.587(2) | O4-Dy1-O1              | 175.84(8) |
| Dy1-N2                    | 2.610(2) | N1-Dy1-N3              | 61.62(8)  |
| Dy1-N3                    | 2.562(2) | N3-Dy1-O3              | 61.75(7)  |
| Dy1-O2                    | 2.569(2) | O3-Dy1-O2              | 58.96(6)  |
| Dy1-O3                    | 2.576(2) | O2-Dy1-O5              | 59.73(6)  |
| Dy1-O5                    | 2.609(2) | O5-Dy1-N2              | 61.68(7)  |
| Dy1-O1                    | 2.147(2) | N2-Dy1-N1              | 61.36(7)  |
| Dy1-O4                    | 2.163(2) | O4-Dy1-N1              | 93.53(8)  |
|                           |          | O4-Dy1-N3              | 80.41(8)  |
|                           |          | O4-Dy1-O3              | 99.41(7)  |
|                           |          | O4-Dy1-O2              | 96.10(7)  |
|                           |          | O4-Dy1-O5              | 83.45(7)  |
|                           |          | O4-Dy1-N2              | 92.41(8)  |
|                           |          | O1-Dy1-O2              | 87.23(7)  |
|                           |          | O1-Dy1-O3              | 84.45(7)  |
|                           |          | O1-Dy1-N3              | 100.19(8) |
|                           |          | O1-Dy1-N1              | 83.21(7)  |
|                           |          | O1-Dy1-N2              | 83.76(7)  |
|                           |          | O1-Dy1-O5              | 96.13(7)  |

---



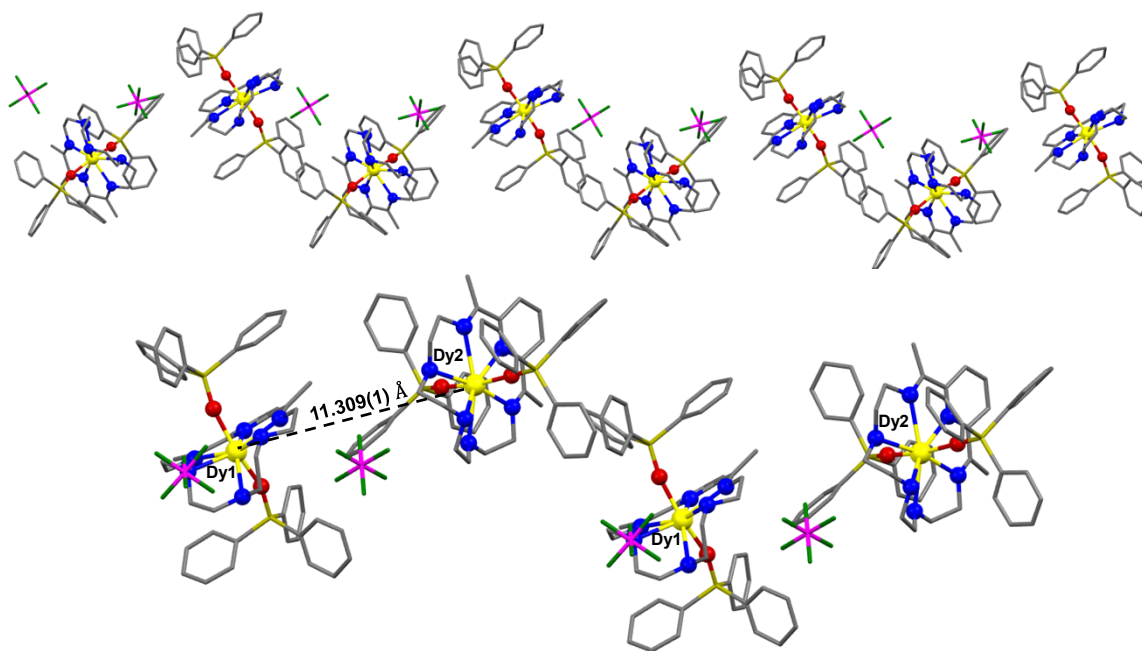

**Fig. S1** (Top) A portion of the alternating sequence of the two crystallographically independent mononuclear complexes in the crystal of **1-L<sup>N6</sup>** viewed along the *c*-axis. (Bottom) Visualization of the shortest intermolecular Dy...Dy distance (black dashed lines) in the crystal of **1-L<sup>N6</sup>**. Color scheme: Dy<sup>III</sup>, yellow; O, red; N, blue; C, grey; Si, olive; P, magenta; F, green. The Dy<sup>III</sup> ions and the donor atoms (N and O) are illustrated as spheres. The CH<sub>2</sub>Cl<sub>2</sub> solvate molecules and the H-atoms are omitted for clarity.

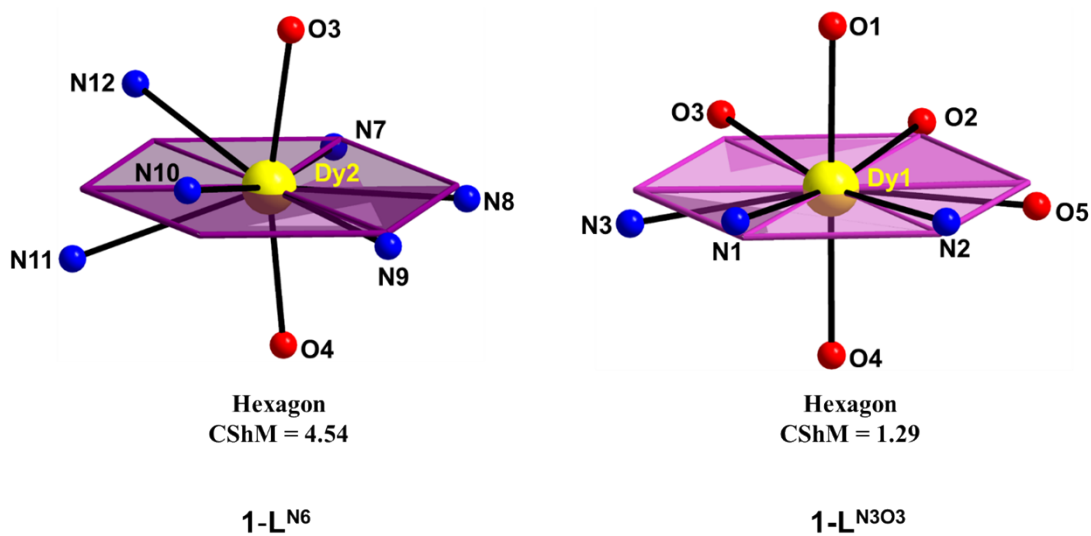

**Fig. S2** Deviation of the equatorial donor atoms of the macrocyclic ligand **L<sup>N6</sup>** (for Dy2) (left) and **L<sup>N303</sup>** (right) in the corresponding complexes from the ideal hexagonal plane

highlighted with purple color. The CShM values according to SHAPE program are indicated. Color scheme: Dy<sup>III</sup>, yellow; O, red; N, blue.

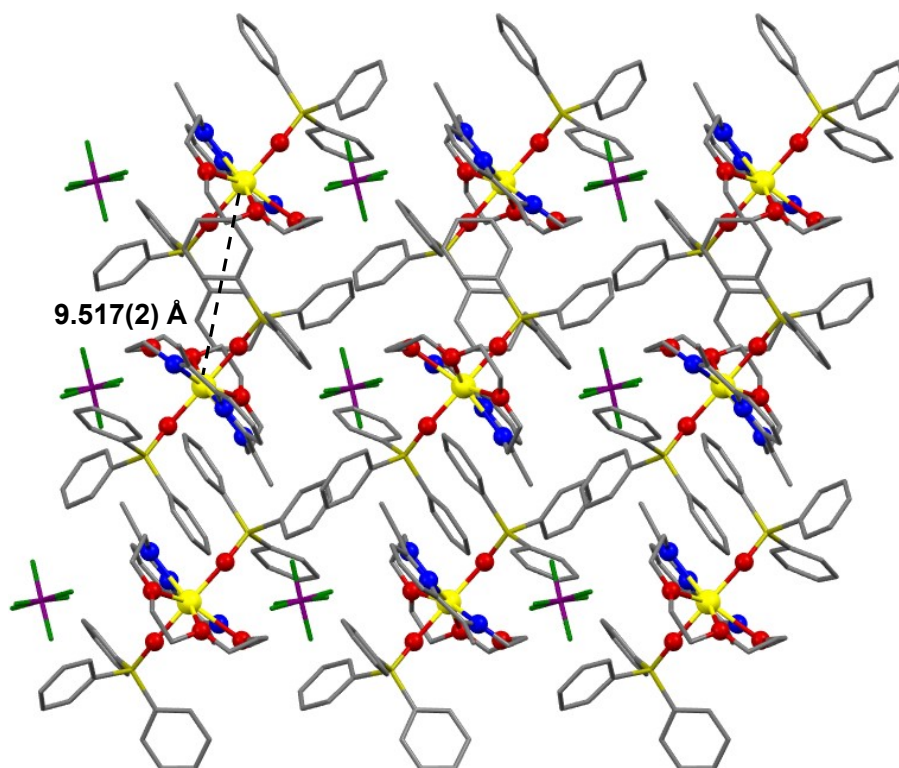

**Fig. S3** A portion of the repeating monomeric complexes in the crystal of **1-L<sup>N3O3</sup>** viewed along the *b*-axis and visualization of the shortest intermolecular Dy<sup>III</sup>···Dy<sup>III</sup> distance as black dashed lines. Color scheme: Dy<sup>III</sup>, yellow; O, red; N, blue; C, grey; Si, olive; P, magenta; F, green. The Dy<sup>III</sup> ions and the donor atoms (N and O) are illustrated as spheres. The H-atoms are omitted for clarity.

### 3. Magnetic Measurements

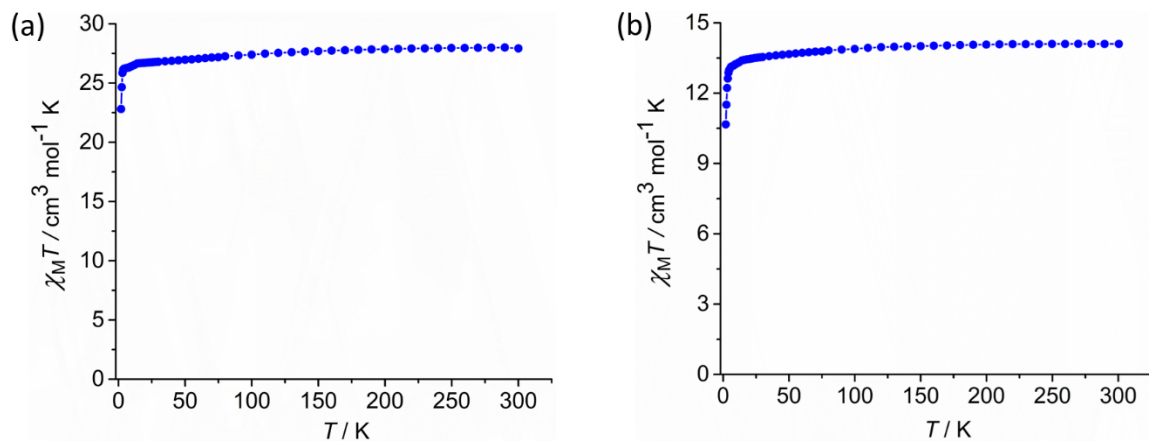

**Fig. S4**  $\chi_M T$  vs.  $T$  plots for complexes (a) 1-L<sup>N6</sup> and (b) 1-L<sup>N303</sup> under an applied *dc* field of 0.1 T. The solid lines are guides only.

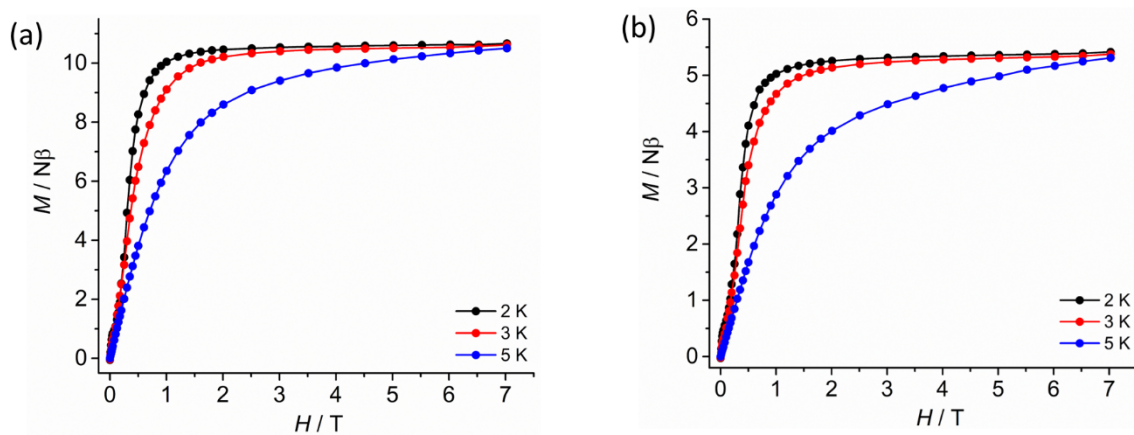

**Fig. S5** Plots of magnetization ( $M$ ) vs field ( $H$ ) for complexes (a) 1-L<sup>N6</sup> and (b) 1-L<sup>N303</sup> at different low temperatures. The solid lines are guides only.

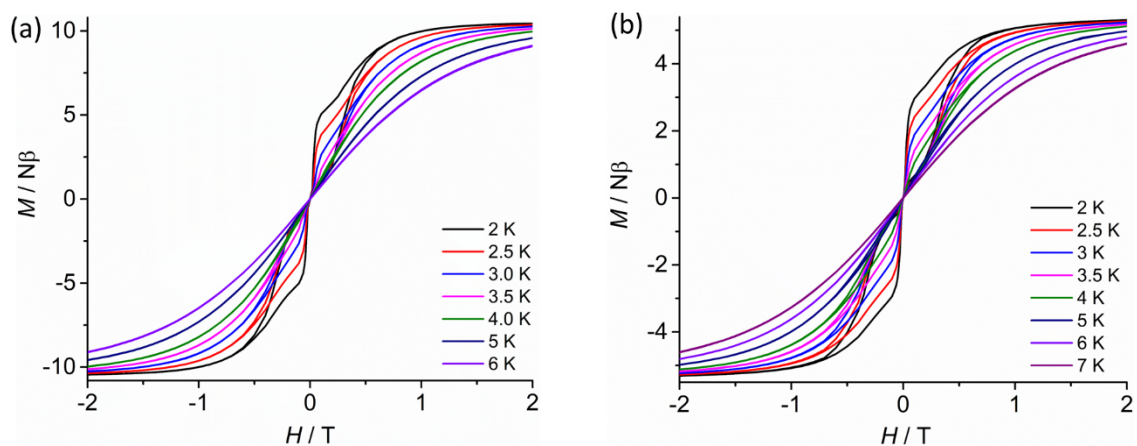

**Fig. S6** Magnetic hysteresis loops for complexes (a)  $1-L^{N6}$  and (b)  $1-L^{N303}$  collected at different low temperatures (2.0-7.0) K with a mean field sweep rate of  $31 \text{ Oe s}^{-1}$ .

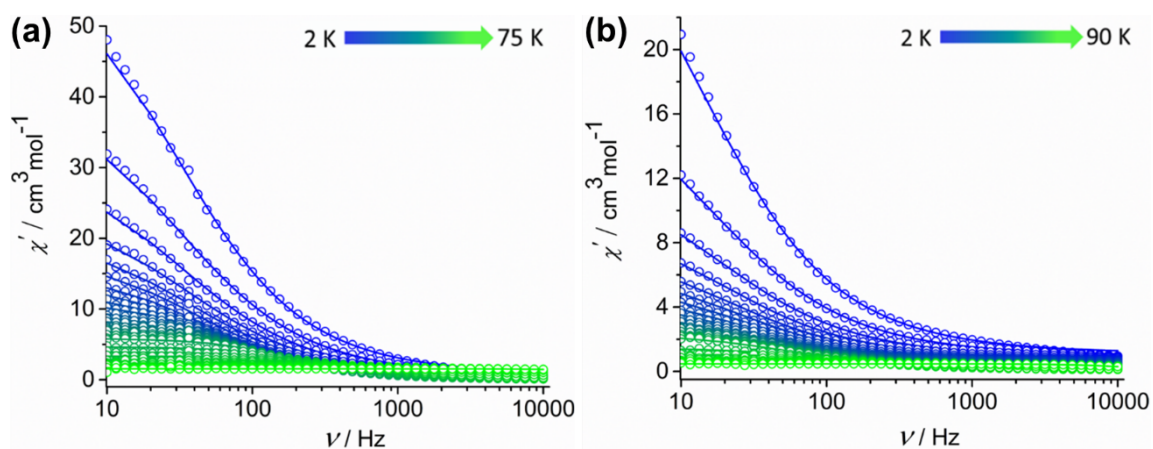

**Fig. S7** (a) Frequency dependence of the in-phase ( $\chi_M'$ ) magnetic susceptibility under zero applied  $dc$  field for complex  $1-L^{N6}$  over the temperature range 2-75 K. (b) Frequency dependence of the in-phase ( $\chi_M'$ ) magnetic susceptibility under zero applied  $dc$  field for complex  $1-L^{N303}$  over the temperature range 2-90 K. Solid lines represent fits to the data.

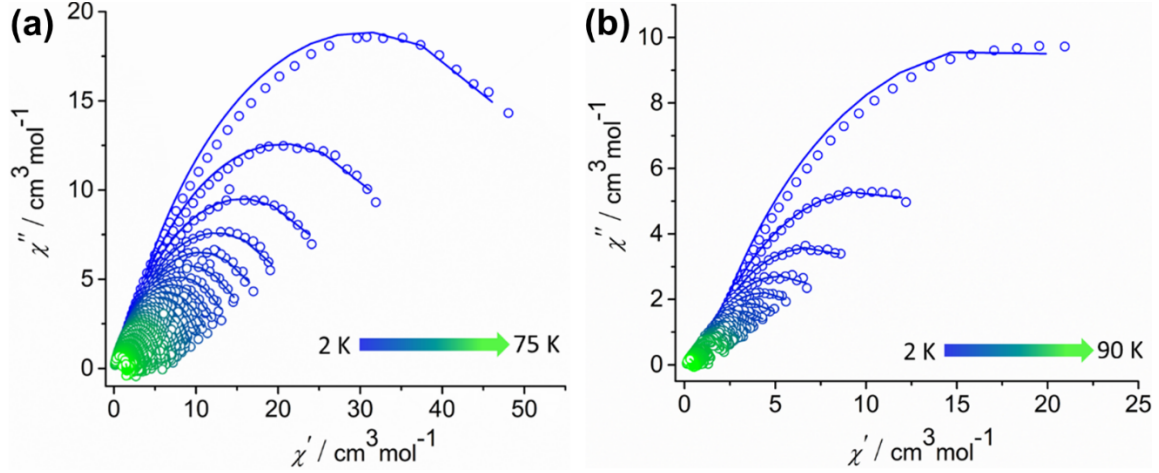

**Fig. S8** (a) Cole-Cole plots for complex **1-L<sup>N6</sup>** obtained from the *ac* susceptibility data in zero applied *dc* field at  $T = 2\text{-}75$  K. (b) Cole-Cole plots for complex **1-L<sup>N303</sup>** obtained from the *ac* susceptibility data in zero applied *dc* field at  $T = 2\text{-}90$  K. Solid lines represent fits to the data using **Equations S1** and **S2**.<sup>10</sup> The parameters are listed in **Table S5** for **1-L<sup>N6</sup>** and **Table S6** for **1-L<sup>N303</sup>**.

$$\chi'(\nu) = \chi_S + \frac{(\chi_T - \chi_S)[1 + (2\pi\nu\tau)^{(1-\alpha)} \sin(\frac{\alpha\pi}{2})]}{1 + 2(2\pi\nu\tau)^{(1-\alpha)} \sin(\frac{\alpha\pi}{2}) + (2\pi\nu\tau)^{2(1-\alpha)}} \quad \text{(Equation S1)}$$

$$\chi''(\nu) = \frac{(\chi_T - \chi_S)(2\pi\nu\tau)^{(1-\alpha)} \cos(\frac{\alpha\pi}{2})}{1 + 2(2\pi\nu\tau)^{(1-\alpha)} \sin(\frac{\alpha\pi}{2}) + (2\pi\nu\tau)^{2(1-\alpha)}} \quad \text{(Equation S2)}$$

**Table S5.** Relaxation fitting parameters for complex **1-L<sup>N6</sup>**.

| $T / \text{K}$ | $\chi_S / \text{cm}^3 \text{mol}^{-1}$ | $\chi_T / \text{cm}^3 \text{mol}^{-1}$ | $\tau / \text{s}$ | $\alpha$ |
|----------------|----------------------------------------|----------------------------------------|-------------------|----------|
| 2              | 0.71146                                | 60.27894                               | 0.00494           | 0.28151  |
| 3              | 0.45029                                | 40.87205                               | 0.00489           | 0.29068  |
| 4              | 0.33708                                | 31.05302                               | 0.0048            | 0.29395  |
| 5              | 0.27295                                | 24.76477                               | 0.00446           | 0.29244  |
| 6              | 0.26428                                | 20.81069                               | 0.00417           | 0.2812   |

|    |         |          |            |         |
|----|---------|----------|------------|---------|
| 7  | 0.26945 | 17.87502 | 0.00378    | 0.26274 |
| 8  | 0.25449 | 15.54473 | 0.00348    | 0.24878 |
| 9  | 0.25114 | 13.81526 | 0.00306    | 0.22935 |
| 10 | 0.23042 | 12.37884 | 0.00269    | 0.21642 |
| 11 | 0.21784 | 11.2282  | 0.00237    | 0.20121 |
| 12 | 0.21523 | 10.00405 | 0.00203    | 0.18019 |
| 13 | 0.18996 | 9.33469  | 0.00189    | 0.17797 |
| 14 | 0.18507 | 8.63805  | 0.00168    | 0.16376 |
| 15 | 0.2016  | 7.90002  | 0.00146    | 0.1388  |
| 16 | 0.16642 | 7.52833  | 0.00138    | 0.14721 |
| 17 | 0.19094 | 6.93419  | 0.00119    | 0.11981 |
| 18 | 0.15997 | 6.50535  | 0.0011     | 0.12321 |
| 19 | 0.15692 | 6.16919  | 9.92019E-4 | 0.11528 |
| 20 | 0.17469 | 5.86423  | 8.96256E-4 | 0.09724 |
| 25 | 0.11071 | 4.66443  | 5.90956E-4 | 0.09993 |
| 30 | 0.08344 | 3.92381  | 4.07685E-4 | 0.10032 |
| 35 | 0.06652 | 3.3483   | 2.88128E-4 | 0.10132 |
| 40 | 0.07715 | 2.86326  | 2.04234E-4 | 0.07596 |
| 45 | 0.05107 | 2.57255  | 1.47479E-4 | 0.08898 |
| 50 | 0.04171 | 2.28745  | 9.83283E-5 | 0.09077 |
| 55 | 0.03601 | 2.09409  | 5.85598E-5 | 0.11597 |
| 60 | 0.11369 | 1.93507  | 3.1346E-5  | 0.13409 |
| 65 | 0.34368 | 1.77393  | 1.76642E-5 | 0.08696 |
| 70 | 0.46414 | 1.65644  | 8.74879E-6 | 0.05437 |
| 75 | 0.60226 | 1.54436  | 4.47341E-6 | 0.02269 |

**Table S6.** Relaxation fitting parameters for complex **1-L<sup>N3O3</sup>**.

| $T / \text{K}$ | $\chi_s / \text{cm}^3 \text{mol}^{-1}$ | $\chi_T / \text{cm}^3 \text{mol}^{-1}$ | $\tau / \text{s}$ | $\alpha$ |
|----------------|----------------------------------------|----------------------------------------|-------------------|----------|
| 2              | 1.12584                                | 33.16993                               | 0.01103           | 0.30594  |
| 3              | 0.97476                                | 18.89586                               | 0.0097            | 0.31881  |

|    |         |          |            |         |
|----|---------|----------|------------|---------|
| 4  | 0.8566  | 12.88243 | 0.00873    | 0.31573 |
| 5  | 0.76384 | 9.70494  | 0.00779    | 0.30539 |
| 6  | 0.67491 | 7.95775  | 0.00747    | 0.30625 |
| 7  | 0.62039 | 6.62126  | 0.00659    | 0.28958 |
| 8  | 0.56663 | 5.7534   | 0.00616    | 0.2821  |
| 9  | 0.52306 | 4.9953   | 0.00558    | 0.26889 |
| 10 | 0.48304 | 4.52825  | 0.00543    | 0.27056 |
| 11 | 0.45127 | 4.11007  | 0.00513    | 0.26271 |
| 12 | 0.42581 | 3.74901  | 0.00472    | 0.25255 |
| 13 | 0.39667 | 3.43137  | 0.0044     | 0.24892 |
| 14 | 0.37438 | 3.29006  | 0.00432    | 0.24785 |
| 15 | 0.35425 | 3.15668  | 0.00433    | 0.25018 |
| 16 | 0.33912 | 2.92443  | 0.00407    | 0.24536 |
| 17 | 0.31922 | 2.72724  | 0.00385    | 0.24795 |
| 18 | 0.31032 | 2.56477  | 0.00347    | 0.2283  |
| 19 | 0.29522 | 2.46125  | 0.00341    | 0.23511 |
| 20 | 0.28682 | 2.34266  | 0.00313    | 0.2202  |
| 30 | 0.20233 | 1.45287  | 0.00167    | 0.16164 |
| 40 | 0.16682 | 1.08141  | 9.81621E-4 | 0.11247 |
| 50 | 0.14246 | 0.85249  | 5.91777E-4 | 0.07611 |
| 60 | 0.12572 | 0.70788  | 3.52731E-4 | 0.05765 |
| 70 | 0.12013 | 0.61083  | 1.777E-4   | 0.05604 |
| 80 | 0.12173 | 0.53968  | 6.07293E-5 | 0.04174 |
| 90 | 0.12727 | 0.47028  | 1.56333E-5 | 0.01034 |

## 4. *Ab initio* calculations

### Computational Details

All calculations were carried out on the coordinates obtained from the relevant crystal structure using the ORCA 5.0.2 software package.<sup>11</sup> The positions of hydrogen atoms were optimized at the DFT level using a pure GGA PBE exchange correlation functional, keeping the position of the other atoms constant.<sup>12</sup> To avoid the convergence problem, we replaced Dy<sup>3+</sup> with Y<sup>3+</sup> during the optimizations. The def2-TZVP basis sets with effective core potential (ECP) were used to treat the core electrons of yttrium throughout the DFT calculations.<sup>13</sup> In the multi-reference *ab initio* calculations, we used the DKH (Douglas-Kroll-Hess) Hamiltonian throughout to consider relativistic effects. The dysprosium centre was modelled with the SARC2-DKH-QZVP basis set, and all other atoms were treated with the DKH-def2-TZVP basis set in combination with the ‘AutoAux’ auxiliary basis set.<sup>14</sup> The active space CAS(7,9) was constructed from 9 electrons in 7 f-orbitals. In the configuration interaction procedure, 21 sextets, 128 quartets, and 130 doublets were computed for all the complexes. To consider the spin-orbit coupling, we also used the quasi-degenerate perturbation theory (QDPT) approach using SA-CASSCF wave functions.<sup>15</sup> The SINGLE\_ANISO module as implemented in ORCA was used to compute the g-tensor and crystal field parameters of the low-lying excited states using previously calculated spin-orbit states.<sup>16</sup>

**Table S7.** SINGLE\_ANISO computed crystal-field parameters for the studied complexes.

| k | q  | $1-L^{N6}$  |             | $1-L^{N3O3}$ |
|---|----|-------------|-------------|--------------|
|   |    | Dy1         | Dy2         |              |
|   | -2 | -0.8999E+00 | 0.8150E+00  | -0.2796E+00  |
|   | -1 | 0.6849E+00  | -0.3314E+00 | 0.1645E+00   |
| 2 | 0  | -0.5228E+01 | -0.7186E+01 | -0.7349E+01  |
|   | 1  | -0.5229E+00 | -0.1753E+00 | -0.5121E+00  |
|   | 2  | -0.5543E+00 | 0.1140E+01  | -0.2355E+00  |
|   |    |             |             |              |



|   |    |             |             |              |
|---|----|-------------|-------------|--------------|
|   | -4 | 0.7313E-02  | -0.6043E-02 | 0.9647E-04   |
|   | -3 | -0.3276E-01 | -0.4700E-01 | -0.1158E-01  |
|   | -2 | -0.3763E-02 | -0.2046E-02 | -0.1302E-02  |
|   | -1 | -0.4271E-02 | 0.3047E-02  | -0.1849E-02  |
| 4 | 0  | -0.1086E-01 | -0.1379E-01 | -0.14301E-01 |
|   | 1  | 0.9020E-02  | -0.1234E-02 | 0.2657E-02   |
|   | 2  | -0.7550E-02 | -0.6227E-02 | 0.5750E-03   |
|   | 3  | -0.3477E-01 | 0.4144E-01  | -0.5926E-02  |
|   | 4  | 0.2619E-02  | -0.5309E-02 | -0.6408E-03  |
|   |    |             |             |              |
|   | -6 | 0.5510E-03  | -0.5933E-03 | 0.2675E-04   |
|   | -5 | 0.7132E-03  | 0.1148E-03  | -0.3647E-04  |
|   | -4 | 0.5573E-04  | -0.3276E-04 | 0.1038E-04   |
|   | -3 | -0.6159E-04 | -0.1721E-03 | -0.5582E-04  |
|   | -2 | -0.7343E-05 | -0.3092E-04 | -0.8395E-05  |
|   | -1 | -0.6385E-05 | -0.1883E-04 | 0.1536E-04   |
| 6 | 0  | 0.2717E-04  | 0.4904E-04  | 0.4996E-04   |
|   | 1  | -0.9242E-04 | 0.4592E-04  | 0.1530E-04   |
|   | 2  | 0.8810E-05  | -0.2920E-04 | 0.2008E-05   |
|   | 3  | -0.8785E-04 | 0.1592E-03  | 0.1018E-05   |
|   | 4  | 0.1323E-04  | -0.3884E-04 | 0.4604E-05   |
|   | 5  | 0.1132E-03  | -0.1085E-03 | -0.9179E-04  |
|   | 6  | 0.9516E-05  | -0.5509E-04 | -0.6479E-03  |

The Hamiltonian used to calculate the crystal field parameters is the following:

$$\hat{H}_{CF} = \sum_{k=-q}^q B_q^k \hat{\delta}_q^k$$

where  $\hat{\delta}_q^k$  = extended Stevens operators,  $k$  = rank of the ITO (2,4,6),  $q$  = the component of the ITO, =  $-k, -k+1, \dots, 0, 1, \dots, k$ .<sup>17</sup>

**Table S8.** *Ab initio* calculated low-lying spin-orbit energy states for the investigated complexes.

| 1-L <sup>N6</sup> |     | 1-L <sup>N303</sup> |
|-------------------|-----|---------------------|
| Dy1               | Dy2 |                     |

|           |           |           |
|-----------|-----------|-----------|
| 0.000     | 0.000     | 0.000     |
| 0.000     | 0.000     | 0.000     |
| 384.1643  | 481.3223  | 499.0064  |
| 384.1643  | 481.3223  | 499.0064  |
| 670.2686  | 880.9037  | 910.3601  |
| 670.2686  | 880.9037  | 910.3601  |
| 806.6027  | 1108.4679 | 1152.4641 |
| 806.6027  | 1108.4679 | 1152.4641 |
| 862.2454  | 1146.6523 | 1218.2777 |
| 862.2454  | 1146.6523 | 1218.2777 |
| 924.3683  | 1221.1437 | 1240.2093 |
| 924.3683  | 1221.1437 | 1240.2093 |
| 961.6702  | 1299.9197 | 1297.2875 |
| 961.6702  | 1299.9197 | 1297.2875 |
| 1031.1669 | 1373.5719 | 1381.6221 |
| 1031.1669 | 1373.5719 | 1381.6221 |

**Table S9.** Single\_aniso computed energy of the KDs,  $g_x$ , angle between the anisotropic axis of the excited states with the ground state ( $^\circ$ ), and wavefunctions composition for **1-L<sup>N6</sup> (Dy1)**.

| Kramers doublets (KDs) | Energy (cm <sup>-1</sup> ) | $g_x$                | $g_y$                | $g_z$ | angle ( $^\circ$ ) | Wave function composition                                                                                                                  |
|------------------------|----------------------------|----------------------|----------------------|-------|--------------------|--------------------------------------------------------------------------------------------------------------------------------------------|
| 1                      | 0.000                      | $2.1 \times 10^{-3}$ | $2.4 \times 10^{-3}$ | 19.83 |                    | 99.7%  $\pm 15/2$ >                                                                                                                        |
| 2                      | 384.164                    | 0.162                | 0.182                | 16.89 | 1.08               | 98.44%  $\pm 13/2$ >                                                                                                                       |
| 3                      | 670.269                    | 0.161                | 0.564                | 13.31 | 5.25               | 90.50%  $\pm 11/2$ >+4.96%  $\pm 1/2$ >+2.07%  $\pm 7/2$ >                                                                                 |
| 4                      | 806.603                    | 3.892                | 5.339                | 10.84 | 74.16              | 41.68%  $\pm 9/2$ >+7.58%  $\pm 7/2$ >+12.90%  $\pm 5/2$ >+32.23%  $\pm 3/2$ >+4.73%  $\pm 1/2$ >                                          |
| 5                      | 862.245                    | 0.082                | 4.971                | 11.64 | 77.75              | 0.39%  $\pm 13/2$ >+2.65%  $\pm 11/2$ >+19.75%  $\pm 9/2$ >+16.58%  $\pm 7/2$ >+13.37%  $\pm 5/2$ >+0.88%  $\pm 3/2$ >+46.31%  $\pm 1/2$ > |
| 6                      | 924.368                    | 12.00                | 6.721                | 0.054 | 11.04              | 0.41%  $\pm 13/2$ >+4.54%  $\pm 11/2$ >+2.80%  $\pm 9/2$ >+21.39%  $\pm 7/2$ >+27.43%  $\pm 5/2$ >+18.17%  $\pm 3/2$ >+25.19%  $\pm 1/2$ > |
| 7                      | 961.670                    | 2.693                | 5.353                | 8.572 | 77.92              | 29.87%  $\pm 9/2$ >+10.97%  $\pm 7/2$ >                                                                                                    |

|   |          |       |       |       |        |                                                                                     |
|---|----------|-------|-------|-------|--------|-------------------------------------------------------------------------------------|
|   |          |       |       |       |        | $2>+3.23\% \pm 5/2>+38.48\% \pm 3/2>+16.73\% \pm 1/2>$                              |
| 8 | 1031.167 | 1.130 | 3.226 | 15.71 | 100.58 | $4.86\% \pm 9/2>+41.04\% \pm 7/2>+41.40\% \pm 5/2>+9.75\% \pm 3/2>+1.67\% \pm 1/2>$ |

**Table S10.** Magnitudes of transition magnetic moment matrix elements (in Bohr magneton) calculated for **1-L<sup>N6</sup> (Dy1)**.

| Climbing Transition |          |           | Crossing Transition |          |                      |
|---------------------|----------|-----------|---------------------|----------|----------------------|
| Initial KD          | Final KD | Magnitude | Initial KD          | Final KD | Magnitude            |
| 1                   | 2        | 1.765     | 1                   | 1        | $7.6 \times 10^{-4}$ |
| 1                   | 3        | 0.1087    | 1                   | 2        | $2.6 \times 10^{-3}$ |
| 1                   | 4        | 0.05431   | 1                   | 3        | 0.02529              |
| 1                   | 5        | 0.06919   | 1                   | 4        | 0.04943              |
| 1                   | 6        | 0.06030   | 1                   | 5        | 0.03324              |
| 1                   | 7        | 0.05196   | 1                   | 6        | 0.03058              |
| 1                   | 8        | 0.02867   | 1                   | 7        | 0.03603              |
| 2                   | 3        | 2.382     | 1                   | 8        | 0.04751              |
| 2                   | 4        | 0.12502   | 2                   | 2        | 0.05752              |
| 2                   | 5        | 0.2661    | 2                   | 3        | 0.08928              |
| 2                   | 6        | 0.2805    | 2                   | 4        | 0.2041               |
| 2                   | 7        | 0.1805    | 2                   | 5        | 0.2518               |
| 2                   | 8        | 0.08321   | 2                   | 6        | 0.2072               |
| 3                   | 4        | 2.468     | 2                   | 7        | 0.09554              |
| 3                   | 5        | 1.371     | 2                   | 8        | 0.09668              |
| 3                   | 6        | 0.7164    | 3                   | 3        | 0.1347               |
| 3                   | 7        | 0.9200    | 3                   | 4        | 0.5460               |
| 3                   | 8        | 0.2644    | 3                   | 5        | 0.8147               |
| 4                   | 5        | 1.808     | 3                   | 6        | 0.5280               |
| 4                   | 6        | 1.139     | 3                   | 7        | 0.3561               |

|   |   |        |   |   |        |
|---|---|--------|---|---|--------|
| 4 | 7 | 0.8999 | 3 | 8 | 0.2316 |
| 4 | 8 | 0.4525 | 4 | 4 | 2.4424 |
| 5 | 6 | 1.667  | 4 | 5 | 2.1726 |
| 5 | 7 | 1.547  | 4 | 6 | 0.9246 |
| 5 | 8 | 0.4033 | 4 | 7 | 1.064  |
| 6 | 7 | 2.080  | 4 | 8 | 0.2819 |
| 6 | 8 | 0.7869 | 5 | 5 | 1.190  |
| 7 | 8 | 2.426  | 5 | 6 | 0.9744 |
|   |   |        | 5 | 7 | 1.235  |
|   |   |        | 5 | 8 | 1.117  |
|   |   |        | 6 | 6 | 1.380  |
|   |   |        | 6 | 7 | 1.589  |
|   |   |        | 6 | 8 | 1.288  |
|   |   |        | 7 | 7 | 2.003  |
|   |   |        | 7 | 8 | 1.411  |
|   |   |        | 8 | 8 | 1.543  |

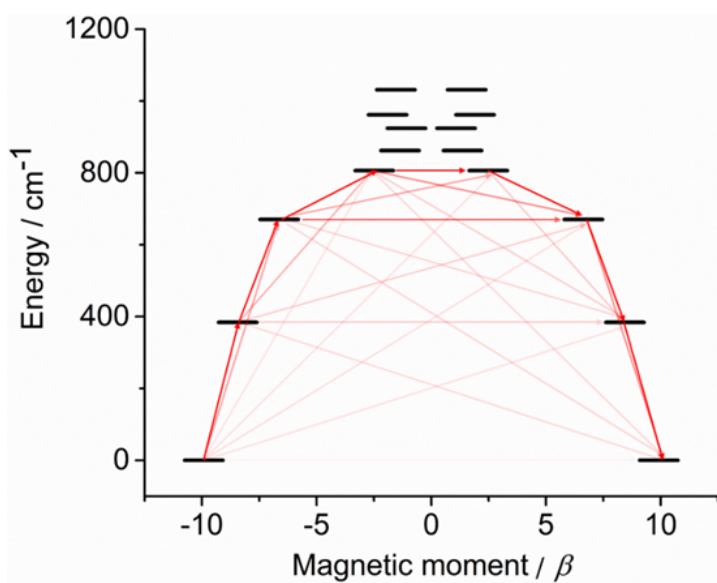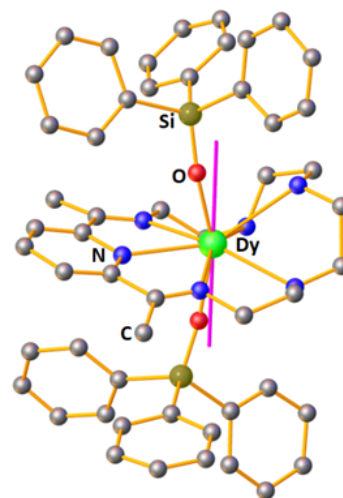

**Fig. S9** (left) Single\_aniso computed energy of the KDs for complex **1-L<sup>N6</sup> (Dy1)**. Dark red arrows show the most probable relaxation route and light red arrows indicate less significant but non-negligible matrix elements between states. (right) The orientation of the ground state anisotropic axis (purple rod).

**Table S11.** Single\_aniso computed energy of the KDs,  $g_x$ ,  $g_y$ ,  $g_z$ , angle between the anisotropic axis of the excited states with ground state ( $^\circ$ ), and wavefunctions composition for **1-L<sup>N6</sup> (Dy2)**.

| Kramers doublets (KDs) | Energy (cm <sup>-1</sup> ) | $g_x$                | $g_y$                | $g_z$ | angle ( $^\circ$ ) | Wave function composition                                                                                             |
|------------------------|----------------------------|----------------------|----------------------|-------|--------------------|-----------------------------------------------------------------------------------------------------------------------|
| 1                      | 0.000                      | $2.9 \times 10^{-4}$ | $5.5 \times 10^{-4}$ | 19.85 |                    | 99.85%  $\pm 15/2$ >                                                                                                  |
| 2                      | 481.322                    | 0.081                | 0.089                | 16.92 | 0.74               | 99.33%  $\pm 13/2$ >                                                                                                  |
| 3                      | 880.904                    | 0.344                | 0.480                | 13.71 | 0.74               | 95.73%  $\pm 11/2$ >+2.40%  $\pm 1/2$ >                                                                               |
| 4                      | 1108.468                   | 4.250                | 5.869                | 7.701 | 71.20              | 48.17%  $\pm 9/2$ >+4.90%  $\pm 7/2$ >+3.23%  $\pm 5/2$ >+0.86%  $\pm 3/2$ >+33.08%  $\pm 1/2$ >                      |
| 5                      | 1146.652                   | 0.940                | 3.468                | 13.95 | 76.47              | 2.17%  $\pm 11/2$ >+16.32%  $\pm 9/2$ >+0.63%  $\pm 7/2$ >+16.98%  $\pm 5/2$ >+9.82%  $\pm 3/2$ >+53.92%  $\pm 1/2$ > |
| 6                      | 1221.144                   | 0.850                | 3.200                | 11.63 | 90.66              | 20.72%  $\pm 9/2$ >+46.57%  $\pm 7/2$ >+23.80%  $\pm 5/2$ >+5.37%  $\pm 3/2$ >+3.15%  $\pm 1/2$ >                     |
| 7                      | 1299.920                   | 0.107                | 1.420                | 16.64 | 91.29              | 1.16%  $\pm 11/2$ >+9.98%  $\pm 9/2$ >+4.29%  $\pm 7/2$ >+13.84%  $\pm 5/2$ >+42.82%  $\pm 3/2$ >+27.69%  $\pm 1/2$ > |
| 8                      | 1373.572                   | 1.004                | 3.124                | 15.49 | 87.20              | 4.56%  $\pm 9/2$ >+42.82%  $\pm 7/2$ >+40.81%  $\pm 5/2$ >+8.79%  $\pm 3/2$ >+2.25%  $\pm 1/2$ >                      |

**Table S12.** Magnitudes of transition magnetic moment matrix elements (in Bohr magneton) calculated for **1-L<sup>N6</sup> (Dy2)**.

| Climbing Transition |          |           | Crossing Transition |          |                      |
|---------------------|----------|-----------|---------------------|----------|----------------------|
| Initial KD          | Final KD | Magnitude | Initial KD          | Final KD | Magnitude            |
| 1                   | 2        | 1.771     | 1                   | 1        | $1.4 \times 10^{-4}$ |
| 1                   | 3        | 0.09743   | 1                   | 2        | $7.3 \times 10^{-3}$ |
| 1                   | 4        | 0.06203   | 1                   | 3        | 0.01124              |
| 1                   | 5        | 0.05146   | 1                   | 4        | 0.03076              |
| 1                   | 6        | 0.01824   | 1                   | 5        | 0.02158              |
| 1                   | 7        | 0.04660   | 1                   | 6        | 0.04313              |
| 1                   | 8        | 0.03220   | 1                   | 7        | 0.03268              |
| 2                   | 3        | 2.388     | 1                   | 8        | 0.04055              |
| 2                   | 4        | 0.1012    | 2                   | 2        | 0.02852              |
| 2                   | 5        | 0.2008    | 2                   | 3        | 0.04292              |
| 2                   | 6        | 0.1361    | 2                   | 4        | 0.08187              |
| 2                   | 7        | 0.1518    | 2                   | 5        | 0.1935               |
| 2                   | 8        | 0.1316    | 2                   | 6        | 0.04547              |
| 3                   | 4        | 2.412     | 2                   | 7        | 0.1413               |
| 3                   | 5        | 1.235     | 2                   | 8        | 0.04765              |
| 3                   | 6        | 0.2990    | 3                   | 3        | 0.1382               |
| 3                   | 7        | 0.559     | 3                   | 4        | 0.2725               |
| 3                   | 8        | 0.2198    | 3                   | 5        | 0.5269               |
| 4                   | 5        | 2.406     | 3                   | 6        | 1.007                |
| 4                   | 6        | 2.079     | 3                   | 7        | 0.4297               |
| 4                   | 7        | 0.9800    | 3                   | 8        | 0.3384               |
| 4                   | 8        | 0.4198    | 4                   | 4        | 2.126                |
| 5                   | 6        | 1.875     | 4                   | 5        | 0.7762               |
| 5                   | 7        | 0.9360    | 4                   | 6        | 1.2780               |
| 5                   | 8        | 0.7078    | 4                   | 7        | 1.005                |
| 6                   | 7        | 0.6213    | 4                   | 8        | 0.2727               |
| 6                   | 8        | 1.505     | 5                   | 5        | 1.280                |
| 7                   | 8        | 1.599     | 5                   | 6        | 1.131                |

|  |  |  |   |   |        |
|--|--|--|---|---|--------|
|  |  |  | 5 | 7 | 0.7594 |
|  |  |  | 5 | 8 | 0.3341 |
|  |  |  | 6 | 6 | 2.571  |
|  |  |  | 6 | 7 | 0.6931 |
|  |  |  | 6 | 8 | 1.654  |
|  |  |  | 7 | 7 | 2.753  |
|  |  |  | 7 | 8 | 1.995  |
|  |  |  | 8 | 8 | 2.911  |

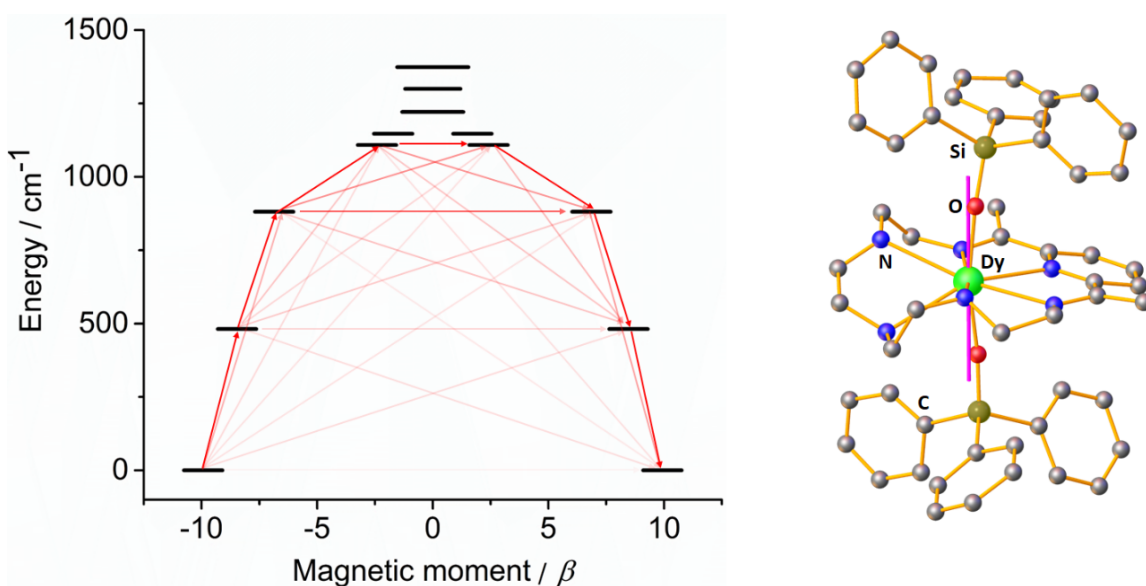

**Fig. S10** (left) Single\_aniso computed energy of the KDs for complex **1-L<sup>N6</sup> (Dy<sup>2</sup>)**. Dark red arrows show the most probable relaxation route and light red arrows indicate less significant but non-negligible matrix elements between states. (right) The orientation of the ground state anisotropic axis (purple rod).

**Table S13.** Single\_aniso computed energy of the KDs,  $g_x$ ,  $g_y$ ,  $g_z$ , angle between the anisotropic axis of the excited states with the ground state ( $^\circ$ ), and wavefunctions composition for **1-L<sup>N303</sup>**.

| Kramers doublets | Energy (cm <sup>-1</sup> ) | $g_x$ | $g_y$ | $g_z$ | angle ( $^\circ$ ) | Wave function composition |
|------------------|----------------------------|-------|-------|-------|--------------------|---------------------------|
|------------------|----------------------------|-------|-------|-------|--------------------|---------------------------|

| (KDs) |          |                      |                      |       |       |                                                                                     |
|-------|----------|----------------------|----------------------|-------|-------|-------------------------------------------------------------------------------------|
| 1     | 0.000    | $4.6 \times 10^{-4}$ | $4.8 \times 10^{-4}$ | 19.86 |       | 99.96% ±15/2>                                                                       |
| 2     | 499.006  | 0.096                | 0.099                | 16.94 | 0.78  | 99.69% ±13/2>                                                                       |
| 3     | 910.360  | 0.058                | 0.180                | 13.75 | 2.03  | 96.73% ±11/2>+2.93% ±1/2>                                                           |
| 4     | 1152.464 | 1.272                | 2.709                | 6.620 | 7.75  | 66.31% ±9/2>+1.01% ±7/2>+3<br>0.92% ±3/2>+0.86% ±1/2>                               |
| 5     | 1218.278 | 9.662                | 7.637                | 1.083 | 1.32  | 2.63% ±11/2>+1.67% ±9/2>+5<br>.79% ±7/2>+9.75% ±5/2>+0.5<br>5% ±3/2>+79.39% ±1/2>   |
| 6     | 1240.209 | 0.709                | 5.516                | 11.24 | 94.33 | 0.34% ±11/2>+2.08% ±9/2>+4<br>0.16% ±7/2>+41.20% ±5/2>+1<br>.58% ±3/2>+14.56% ±1/2> |
| 7     | 1297.287 | 0.046                | 1.030                | 4.55  | 86.60 | 29.23% ±9/2>+1.03% ±7/2>+1<br>.72% ±5/2>+66.12% ±3/2>+1.<br>81% ±1/2>               |
| 8     | 1381.622 | 11.69                | 7.723                | 1.613 | 6.61  | 51.93% ±7/2>+46.55% ±5/2>+<br>0.77% ±3/2>+0.17% ±1/2>                               |

**Table S14.** Magnitudes of transition magnetic moment matrix elements (in Bohr magneton) calculated for  $1-L^{N3O3}$ .

| Climbing Transition |          |           | Crossing Transition |          |                      |
|---------------------|----------|-----------|---------------------|----------|----------------------|
| Initial KD          | Final KD | Magnitude | Initial KD          | Final KD | Magnitude            |
| 1                   | 2        | 1.770     | 1                   | 1        | $1.5 \times 10^{-4}$ |
| 1                   | 3        | 0.04292   | 1                   | 2        | $5.6 \times 10^{-4}$ |
| 1                   | 4        | 0.01558   | 1                   | 3        | 0.01358              |
| 1                   | 5        | 0.03357   | 1                   | 4        | 0.02346              |
| 1                   | 6        | 0.02190   | 1                   | 5        | 0.008197             |
| 1                   | 7        | 0.02138   | 1                   | 6        | 0.03082              |
| 1                   | 8        | 0.01120   | 1                   | 7        | 0.02682              |
| 2                   | 3        | 2.388     | 1                   | 8        | 0.03038              |
| 2                   | 4        | 0.07369   | 2                   | 2        | 0.03260              |
| 2                   | 5        | 0.1442    | 2                   | 3        | 0.04809              |
| 2                   | 6        | 0.08565   | 2                   | 4        | 0.1016               |



|   |   |         |   |   |         |
|---|---|---------|---|---|---------|
| 2 | 7 | 0.06560 | 2 | 5 | 0.2265  |
| 2 | 8 | 0.02431 | 2 | 6 | 0.08589 |
| 3 | 4 | 2.6069  | 2 | 7 | 0.1085  |
| 3 | 5 | 0.5165  | 2 | 8 | 0.00933 |
| 3 | 6 | 0.3856  | 3 | 3 | 0.0422  |
| 3 | 7 | 0.9313  | 3 | 4 | 0.1024  |
| 3 | 8 | 0.07393 | 3 | 5 | 0.5434  |
| 4 | 5 | 1.024   | 3 | 6 | 0.3200  |
| 4 | 6 | 2.589   | 3 | 7 | 0.3610  |
| 4 | 7 | 1.439   | 3 | 8 | 0.09147 |
| 4 | 8 | 0.5086  | 4 | 4 | 0.6977  |
| 5 | 6 | 1.178   | 4 | 5 | 1.837   |
| 5 | 7 | 1.252   | 4 | 6 | 1.357   |
| 5 | 8 | 0.4561  | 4 | 7 | 0.5507  |
| 6 | 7 | 1.117   | 4 | 8 | 0.1280  |
| 6 | 8 | 1.172   | 5 | 5 | 2.853   |
| 7 | 8 | 2.961   | 5 | 6 | 1.260   |
|   |   |         | 5 | 7 | 2.484   |
|   |   |         | 5 | 8 | 0.5328  |
|   |   |         | 6 | 6 | 2.141   |
|   |   |         | 6 | 7 | 0.9883  |
|   |   |         | 6 | 8 | 1.0189  |
|   |   |         | 7 | 7 | 1.039   |
|   |   |         | 7 | 8 | 1.434   |
|   |   |         | 8 | 8 | 2.882   |

## **5. Additional data and plots**

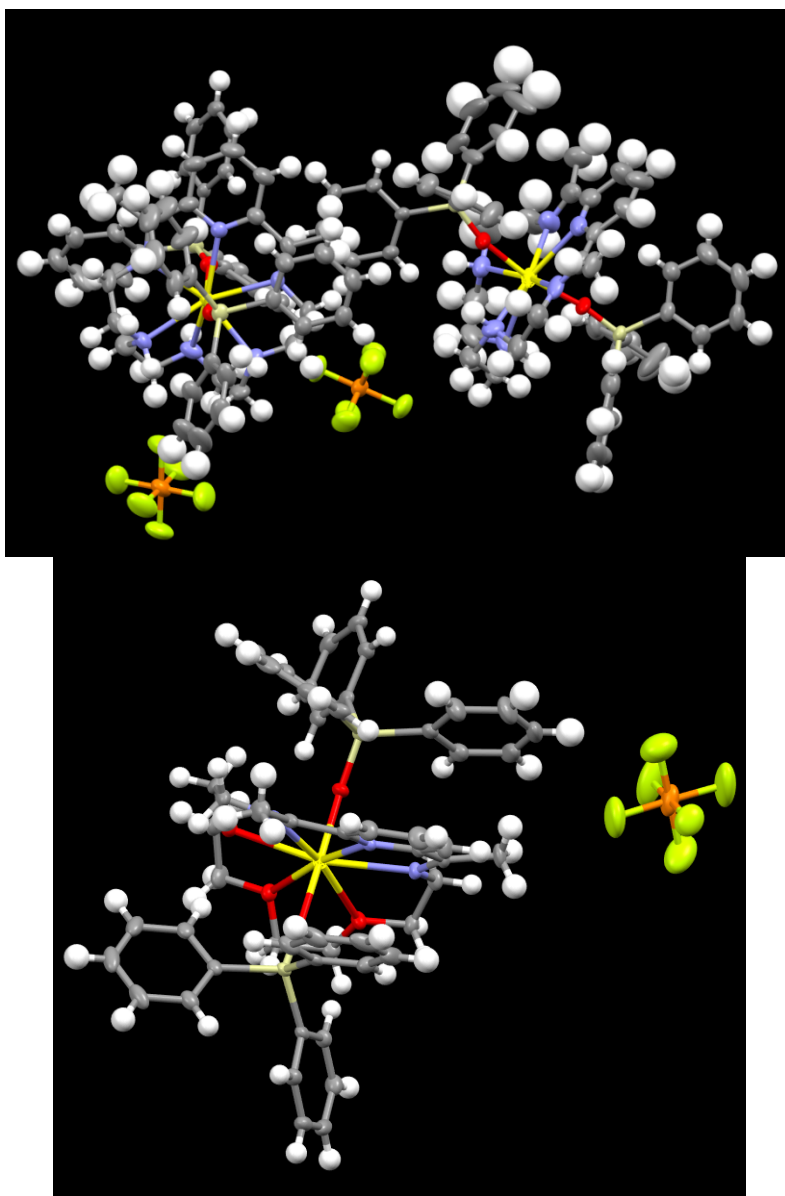

**Fig. S11** ORTEP representations of complexes **1-L<sup>N6</sup>** (top) and **1-L<sup>N303</sup>** (bottom); thermal ellipsoids are at the 30% probability level.

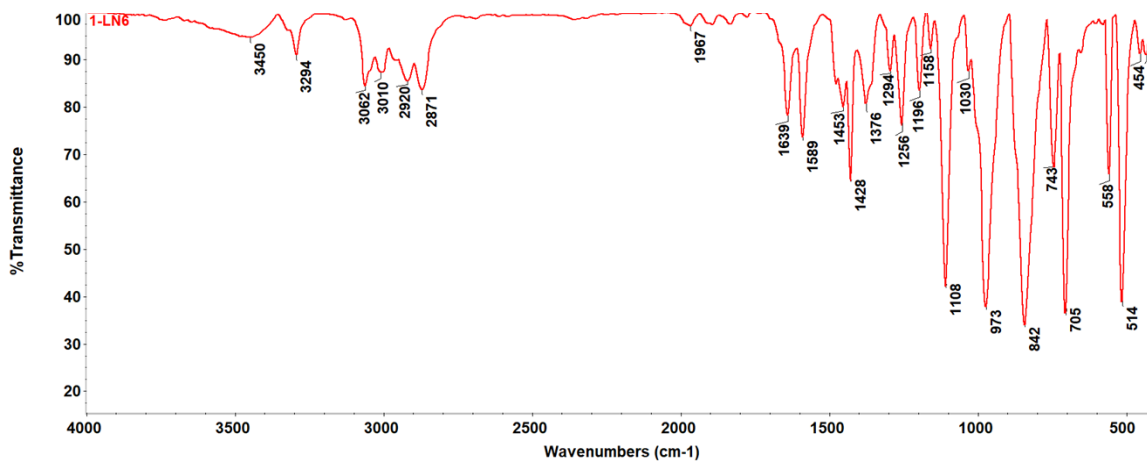

**Fig. S12** FT-IR (KBr,  $\text{cm}^{-1}$ ) spectrum of the compound **1-L<sup>N6</sup>**.

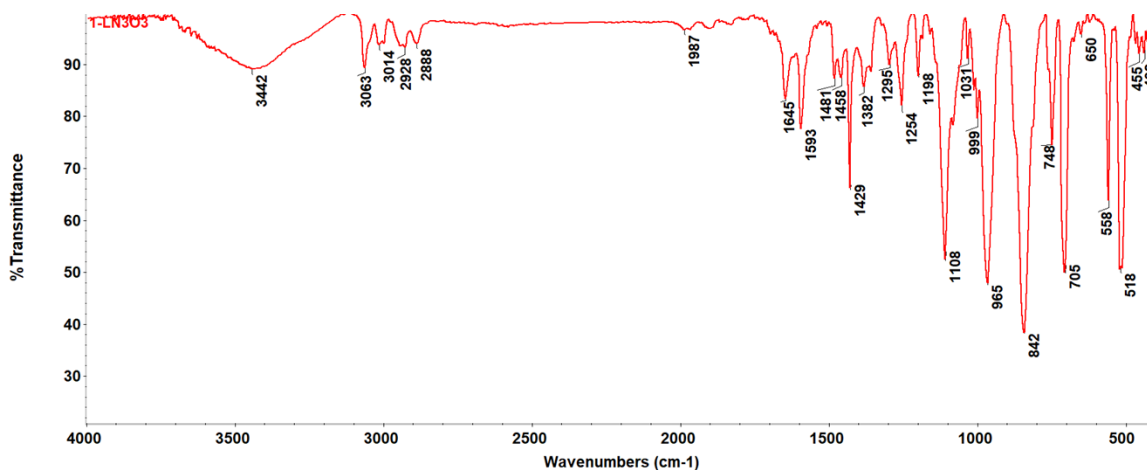

**Fig. S13** FT-IR (KBr,  $\text{cm}^{-1}$ ) spectrum of the compound **1-L<sup>N303</sup>**.

## 6. References

- [1] G. A. Bain, J. F. Berry, *J. Chem. Ed.* 2008, **85**, 532-536.
- [2] *CrystalClear*, Rigaku/MSI Inc., The Woodlands, TX, USA, 2005.
- [3] G. M. Sheldrick, *Acta Crystallogr., Sect. A: Fundam. Crystallogr.*, 2008, **64**, 112.
- [4] G. M. Sheldrick, *Acta Crystallogr., Sect. C: Struct. Chem.*, 2015, **C71**, 3–8.
- [5] A. L. Spek, *Acta Crystallogr., Sect. C: Cryst. Struct. Commun.*, 2015, **71**, 9.
- [6] G. M. Sheldrick, *Acta Crystallogr., Sect. A: Found. Adv.*, 2015, **A71**, 3–8.
- [7] O. V. Dolomanov, L. J. Bourhis, R. J. Gildea, J. A. K. Howard and H. Puschmann, *J. Appl. Crystallogr.*, 2009, **42**, 339–341.

- [8] K. Brandenburg, *DIAMOND, Release 3.1f*, Crystal Impact GbR, Bonn, Germany, 2008.
- [9] J. Bruno, J. C. Cole, P. R. Edgington, M. K. Kessler, C. F. Macrae, P. McCabe, J. Pearson and R. Taylor, *Acta Crystallogr., Sect. B: Struct. Sci.*, 2002, **58**, 389–397.
- [10] J. Tang and P. Zhang, *Lanthanide Single Molecule Magnets*, Springer Berlin Heidelberg, Berlin, Heidelberg, 2015.
- [11] F. Neese, F. Wennmohs, U. Becker and C. Riplinger, *J. Chem. Phys.*, 2020, **152**, 224108.
- [12] (a) J. P. Perdew, K. Burke and M. Ernzerhof, *Phys. Rev. Lett.*, 1997, **78**, 1396-1396. (b) J. P. Perdew, K. Burke and M. Ernzerhof, *Phys. Rev. Lett.*, 1996, **77**, 3865-3868.
- [13] (a) A. Schäfer, H. Horn and R. Ahlrichs, *J. Chem. Phys.*, 1992, **97**, 2571-2577. (b) F. Weigend and R. Ahlrichs, *Phys. Chem. Chem. Phys.*, 2005, **7**, 3297-3305.
- [14] (a) D. Aravena, F. Neese and D. A. Pantazis, *J. Chem. Theory Comput.*, 2016, **12**, 1148-1156. (b) J. Chmela and M. E. Harding, *Mol. Phys.*, 2018, **116**, 1523-1538.
- [15] D. Ganyushin and F. Neese, *J. Chem. Phys.*, 2006, **125**, 024103.
- [16] L. F. Chibotaru and L. Ungur, *J. Chem. Phys.*, 2012, **137**, 064112.
- [17] (a) K. W. H. Stevens, *Rep. Prog. Phys.*, 1967, **30**, 189–226. (b) K. W. H. Stevens, *Proc. Phys. Soc. A*, 1952, **65**, 209–215.
